# Supplementary material for: LIBS analysis of elemental carbon and fixed carbon in coal by dual-cycle regression based on matrix-matched calibration
Source: Royal Society of Chemistry journal article supplement (doi:10.1039/d3ja00324h), 2024-01-01
Supplement: d3ja00324h2.xlsx [file d3ja00324h2.xlsx]

## Sheet: Sheet1
Table S1. Carbon, fixed carbon, hydrogen, moisture, volatile matter, gross calorific, and net calorific of the coal samples.
Sample No.	Carbon (wt%)	Fixed carbon (wt%)	Hydrogen (wt%)	Moisture (wt%)	Volatile matter (wt%)	Gross calorific (Mg/kJ)	Net calorific (Mg/kJ)
1	64.6438	45.91	4.15	6.32	35.03	25.84	21.81
2	64.8606	36.57	3.76	9.14	35.59	22.19	17.34
3	65.348	42.99	3.84	8.27	33.53	24.02	21.32
4	65.4508	45.76	4.4	4.56	36.18	26.14	21.41
5	65.5926	39.94	4.46	11.5	37.76	23.91	20.3
6	65.8951	43.36	4.27	8.34	37.6	24.75	18.42
7	65.9129	40.68	3.72	5.55	33.39	22.8	18.07
8	66.2582	44.92	4.39	8.52	35.82	25.16	21.33
9	66.2783	40.33	4.19	12.34	38.12	23.53	18.76
10	66.2847	37.1	4.26	14.46	34.87	21.61	17.45
11	66.3777	42.85	4.26	10.52	35.33	24.32	20.81
12	67.053	41.46	3.89	12.12	32.56	22.85	18.84
13	67.1515	43.99	4.36	9.61	37.2	25.21	21.09
14	67.1967	42.15	4.19	13.06	37.38	24.67	19.76
15	67.3178	41.85	4.53	9.68	37.64	24.57	20.76
16	67.3768	42.54	4.29	10.94	36.92	24.6	20.87
17	67.3835	43.64	4.02	13.01	33.44	24.04	20.02
18	67.3927	45.89	3.48	6.02	29.41	24.15	20.8
19	67.3971	42.42	3.85	13.88	34.76	23.97	19.49
20	67.589	47.44	3.83	9.42	30.98	25	20.63
21	67.676	43.14	3.93	7.6	33.96	24.3	20.34
22	67.7433	47.82	4.49	3.36	37.96	27.11	20.22
23	67.8074	42.89	3.82	9.92	30.79	23.42	20.08
24	67.9146	46.56	4.14	7.74	34.44	25.91	21
25	67.9181	42.78	3.65	10.18	31.06	23.21	19.55
26	68.0522	42.6	4.24	9	38.7	25.13	18.87
27	68.0724	42.52	4.14	10.48	36.6	24.72	21.36
28	68.0816	47.53	4.21	8.62	33.13	26	22.41
29	68.1355	39.69	4.04	12.74	34.48	23.1	19.46
30	68.1771	42.55	4.29	10.17	33.78	24.29	21.18
31	68.2335	40.95	4.24	11.59	33.68	23.45	19.86
32	68.2467	45.26	4.22	5.82	32.64	24.91	21.05
33	68.3604	43.31	4.1	8.03	36.04	25.2	21.21
34	68.3631	45.85	4.42	6.08	37.86	26.36	20.66
35	68.4031	42.6	4.28	9.13	33.82	24.54	21.21
36	68.405	46.54	4.1	5.5	31.64	25.54	22.21
37	68.5766	46.42	4.44	6.73	36.5	26.47	22.32
38	68.6345	43.62	4.52	10.44	35.91	25.54	21.7
39	68.6419	43.41	3.64	10.84	30.12	23.62	20.82
40	68.7091	45.7	3.9	7.26	30.2	24.36	21.08
41	68.7422	41.9	4.12	9.56	35.34	23.76	19.14
42	68.7632	43.45	4.02	8.58	33.08	24.57	21.37
43	68.7634	44.62	4.11	11.36	34.98	25.34	20.98
44	68.8013	47.13	3.8	6.56	30.33	25.23	22.46
45	68.8231	46.73	4.67	7.03	37.52	26.98	22.35
46	68.854	43.58	4.03	7.2	33.37	24.85	21.37
47	68.9014	45.52	4.07	11.62	32.5	24.76	21.9
48	69.0331	45.2	4.08	7.48	32.34	25.04	22.17
49	69.061	44.39	4.02	11.49	35.76	25	20.05
50	69.0709	45.93	4.14	11.76	32.9	25.26	21.67
51	69.0743	44.96	3.76	13.88	30.22	24.04	20.83
52	69.1625	52.15	4.4	3.08	34.34	28.27	21.91
53	69.2164	44.32	3.92	9.96	30.84	23.99	20.76
54	69.2557	43.76	4.19	8.46	33.28	24.33	20.33
55	69.272	40.12	3.92	11.66	34.78	23.15	19.22
56	69.2828	43.96	4.3	10.92	37.24	25.42	20.2
57	69.3062	49.36	4.38	6.36	33.92	27.14	22.56
58	69.31	47.03	4.23	8.6	35.11	26.29	21.03
59	69.3833	47.23	4.53	5.84	38.83	26.89	20.75
60	69.506	45.3	3.96	7.46	30.94	24.44	20.91
61	69.5755	48.72	4.32	7.8	33.84	27.07	23.33
62	69.5819	44.3	4.3	10.86	37.36	26.08	21.97
63	69.6436	43.8	4.6	10.38	38.36	26.05	21.77
64	69.6455	46.63	4.16	10.41	34.12	25.7	22.48
65	69.8444	46.71	4.32	6.7	34.88	26.4	21.77
66	69.8765	49.14	4.46	6.66	34.6	27.37	24.27
67	69.9597	49.25	4.31	6.73	34.12	27.2	24.19
68	70.08	44.7	4.2	8.13	34	25.22	21.67
69	70.0828	49.25	4.31	6.92	34.13	26.98	22.63
70	70.0927	46.04	4.71	7.62	38.5	26.93	21.81
71	70.0979	45.22	3.92	7.66	31.28	24.45	20.39
72	70.1661	43.58	4.56	11.48	37.58	25.85	21.9
73	70.1697	49.83	4.38	6.37	34.4	27.39	21.92
74	70.3586	50.83	4.4	3.09	35.6	27.82	21.15
75	70.5019	45.29	3.9	8.13	31.22	24.79	22.25
76	70.595	48.41	4.5	6.92	34.84	27.12	23.6
77	70.6011	46.9	4.3	4.67	34.39	26.21	22.41
78	70.6268	48.36	4.32	7.38	34	26.69	22.12
79	70.7056	48.08	4.52	8.4	34.82	26.94	22.26
80	70.712	48.52	4.43	6.99	35.91	27.36	22.04
81	70.7378	46.22	4.22	6.16	33.62	25.91	22.33
82	70.7998	48.58	4.3	8.04	34.18	26.82	22.86
83	70.8149	44.94	4.34	9.3	38.04	26.2	20.77
84	70.905	42.94	4.28	11.62	38.01	25.52	21.08
85	71.051	45.09	4.02	9.18	31.93	25.12	22.22
86	71.0746	46.32	4.18	6.99	32.65	25.81	22.39
87	71.2192	48.38	4.4	8.78	33.98	26.84	22.32
88	71.335	49.96	4.35	4.8	34.96	27.39	21.29
89	71.4824	49.95	4.24	6.77	33.7	27.25	22.69
90	71.8483	47.17	4.36	4.57	34.66	26.55	22.62
91	71.8684	49.45	4.38	4.2	34.58	27.33	23.25
92	72.0691	50.169	4.3007	6.53883	33.8648	27.365	22.5823
93	72.1432	50.4668	4.36544	4.96909	35.1032	26.7518	21.0304
94	72.3171	50.6783	4.38816	4.92496	35.1646	26.5601	21.403
95	72.3194	50.3529	4.31466	6.55752	33.9183	27.4637	22.6589
96	72.4412	50.3862	4.31774	6.58711	33.0555	27.4882	22.6654
97	72.4838	47.8959	4.3714	5.06064	34.2501	26.8268	23.1472
98	72.5092	50.4579	4.51557	4.3112	34.8298	27.8994	23.1254
99	72.523	50.442	4.32274	6.59939	33.9918	27.5225	22.6831
100	72.709	50.1292	4.49127	4.61114	34.8739	27.7871	23.0936
101	72.7659	44.6	4.1	10.78	35.94	25.22	21.69
102	72.8274	47.7869	4.37292	5.41207	34.3322	26.794	23.1
103	74.9045	44.0299	4.18185	10.4844	36.518	25.2011	21.3828
104	74.9763	40.5655	3.69427	13.3968	34.7162	23.4272	19.5607
105	75.0165	44.8344	4.24853	9.9965	35.5035	25.5684	21.6936
106	76.0243	41.169	3.75478	13.5486	36.5972	23.7703	19.8065
107	76.2916	40.37	3.75	13.25	37	23.45	19.55
